# Supplementary material for: Parishin alleviates vascular ageing in mice by upregulation of Klotho
Source: PubMed Central journal article supplement (PMC10183705; doi:10.1111/jcmm.17740), 2023-04-09

# Supplement Figures

Fig. S1

A

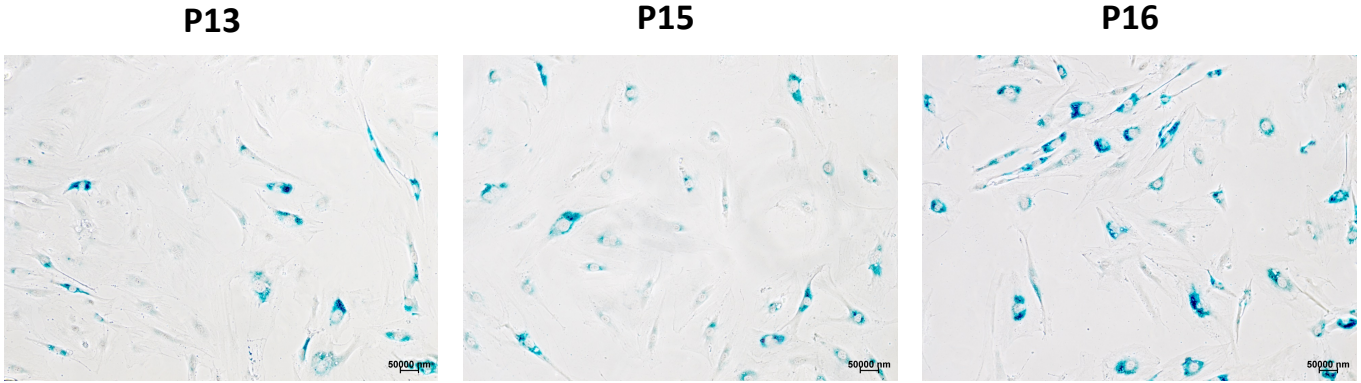

B

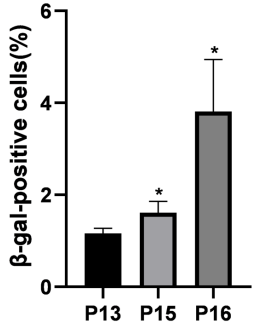

Supplement: JCMM-27-1398-s002.pdf [file JCMM-27-1398-s002.pdf]
