# Supplementary material for: Parishin alleviates vascular ageing in mice by upregulation of Klotho
Source: PubMed Central journal article supplement (PMC10183705; doi:10.1111/jcmm.17740), 2023-04-09

**Fig. S2**

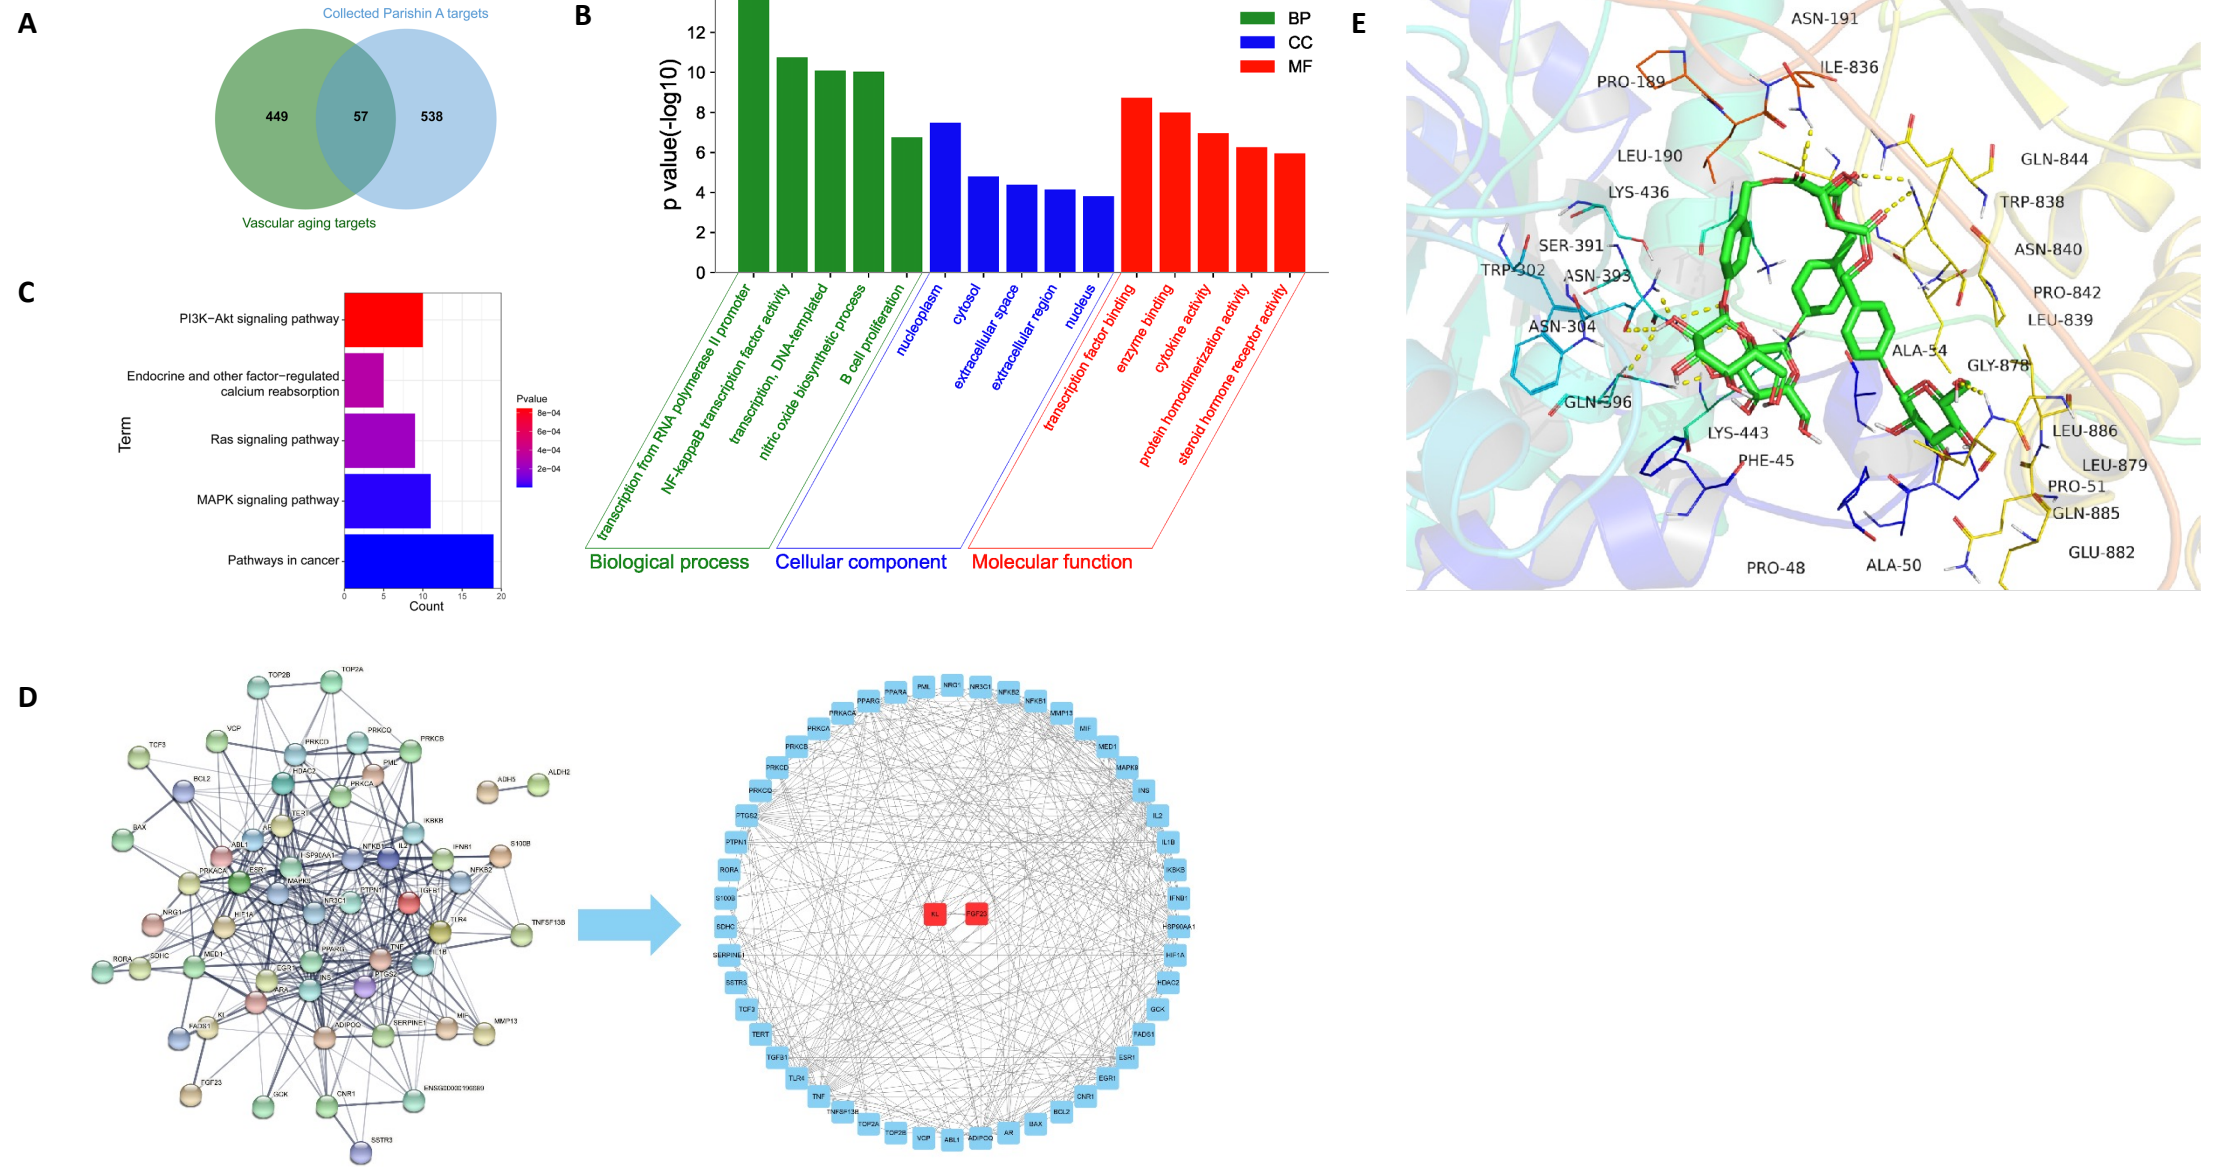

Supplement: JCMM-27-1398-s004.pdf [file JCMM-27-1398-s004.pdf]
